# Supplementary material for: A Green Synthesis of CoFe2O4 Decorated ZIF-8 Composite for Electrochemical Oxygen Evolution
Source: MDPI journal article supplement (doi:10.3390/ijms24119585), 2023-05-31
Supplement: s1 [file s1]

## Supplementary Materials

# A Green Synthesis of $\text{CoFe}_2\text{O}_4$ Decorated ZIF-8 Composite for Electrochemical Oxygen Evolution

Atanu Panda, Hang-Kyu Cho and Hansang Kim \*

Department of Mechanical Engineering, Gachon University, Seongnam-si 13120, Gyeonggi-do, Republic of Korea; santu.atanu.panda@gmail.com (A.P.); 5318@gachon.ac.kr (H.-K.C.)

\* Correspondence: hskim70@gachon.ac.kr (H.K)

**Keywords:** spinel ferrite; ZIF-8; magnetic;  $\text{CoFe}_2\text{O}_4$ ; oxygen evolution reaction

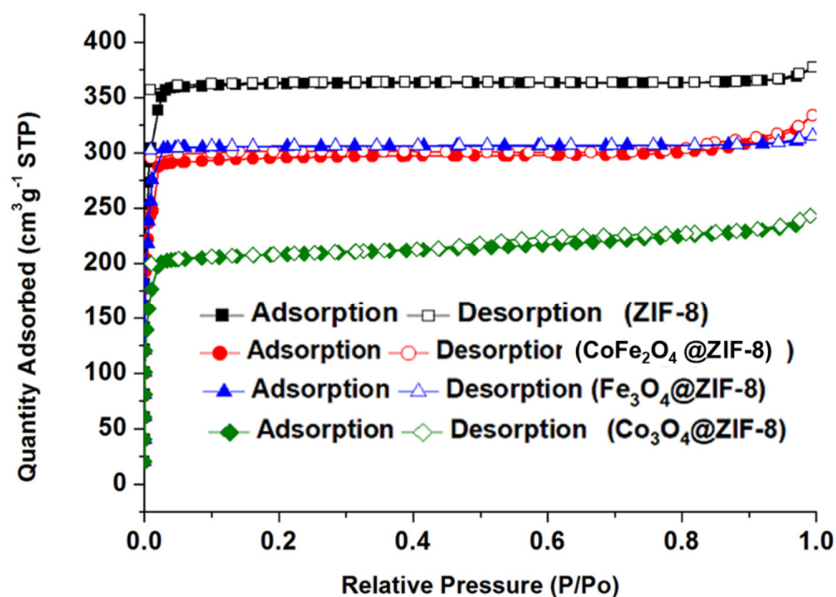

**Figure S1.** BET surface area analysis in  $\text{N}_2$ .

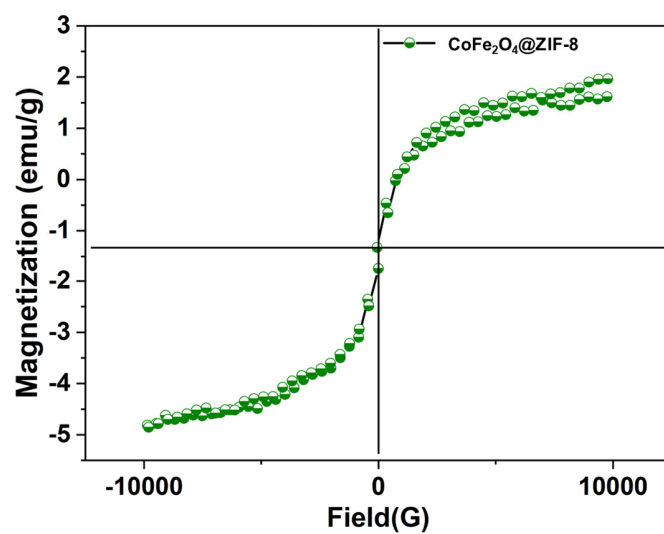

Figure S2. VSM of CoFe<sub>2</sub>O<sub>4</sub>@ZIF-8

| Elem  | Weight % | Atomic % |
|-------|----------|----------|
| C K   | 48.6     | 83.2     |
| FeK   | 8.9      | 3.3      |
| CoK   | 3        | 1        |
| ZnK   | 39.6     | 12.5     |
| Total | 100      | 100      |

Figure S3. EDS elemental composition of CoFe<sub>2</sub>O<sub>4</sub>@ZIF-8.

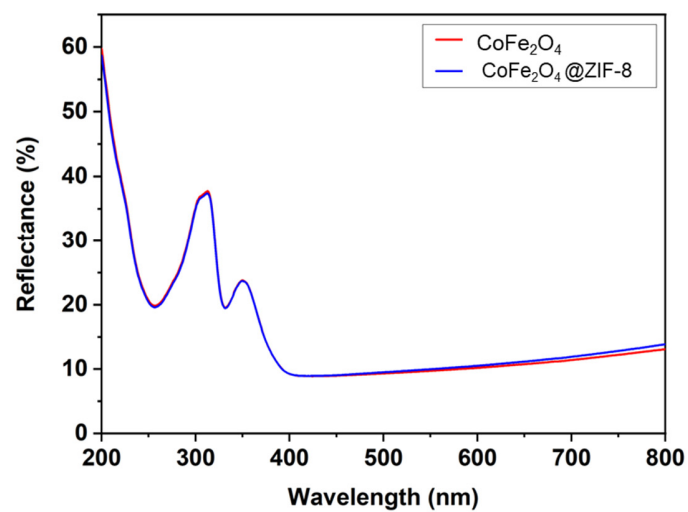

Figure S4. UV-vis-DRS analysis of CoFe<sub>2</sub>O<sub>4</sub> and CoFe<sub>2</sub>O<sub>4</sub>@ZIF-8

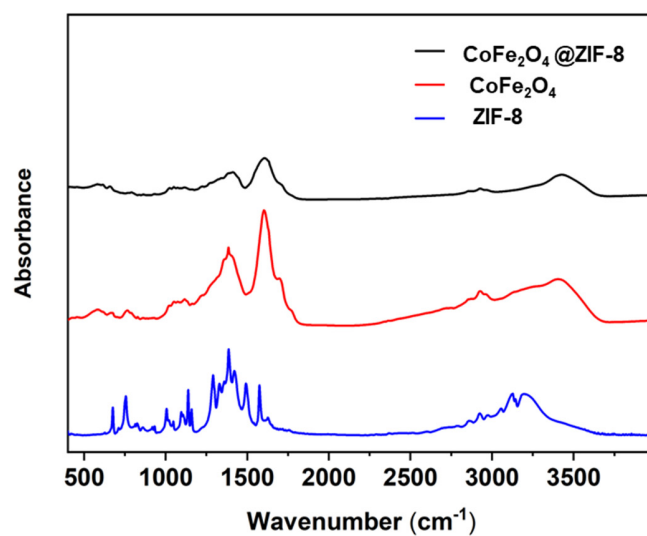

Figure S5. FT-IR analysis of ZIF-8, CoFe<sub>2</sub>O<sub>4</sub> and CoFe<sub>2</sub>O<sub>4</sub>@ZIF-8 samples

Table S1. EDS analysis of ZIF-8, CoFe<sub>2</sub>O<sub>4</sub> and CoFe<sub>2</sub>O<sub>4</sub>@ZIF-8 samples

| Sample                           | Chemical | ms%   |
|----------------------------------|----------|-------|
| ZIF-8                            | C        | 68.67 |
|                                  | O        | 28.72 |
|                                  | Zn       | 2.62  |
| CoFe <sub>2</sub> O <sub>4</sub> | C        | 65.90 |
|                                  | O        | 28.88 |
|                                  | Fe       | 2.48  |
|                                  | Co       | 0.41  |

Table S2. A list of average pore diameter from BET measurements.

|                                         | Average pore diameter (Å) |
|-----------------------------------------|---------------------------|
| ZIF-8                                   | 11.7                      |
| CoFe <sub>2</sub> O <sub>4</sub>        | 24                        |
| CoFe <sub>2</sub> O <sub>4</sub> @ZIF-8 | 32                        |

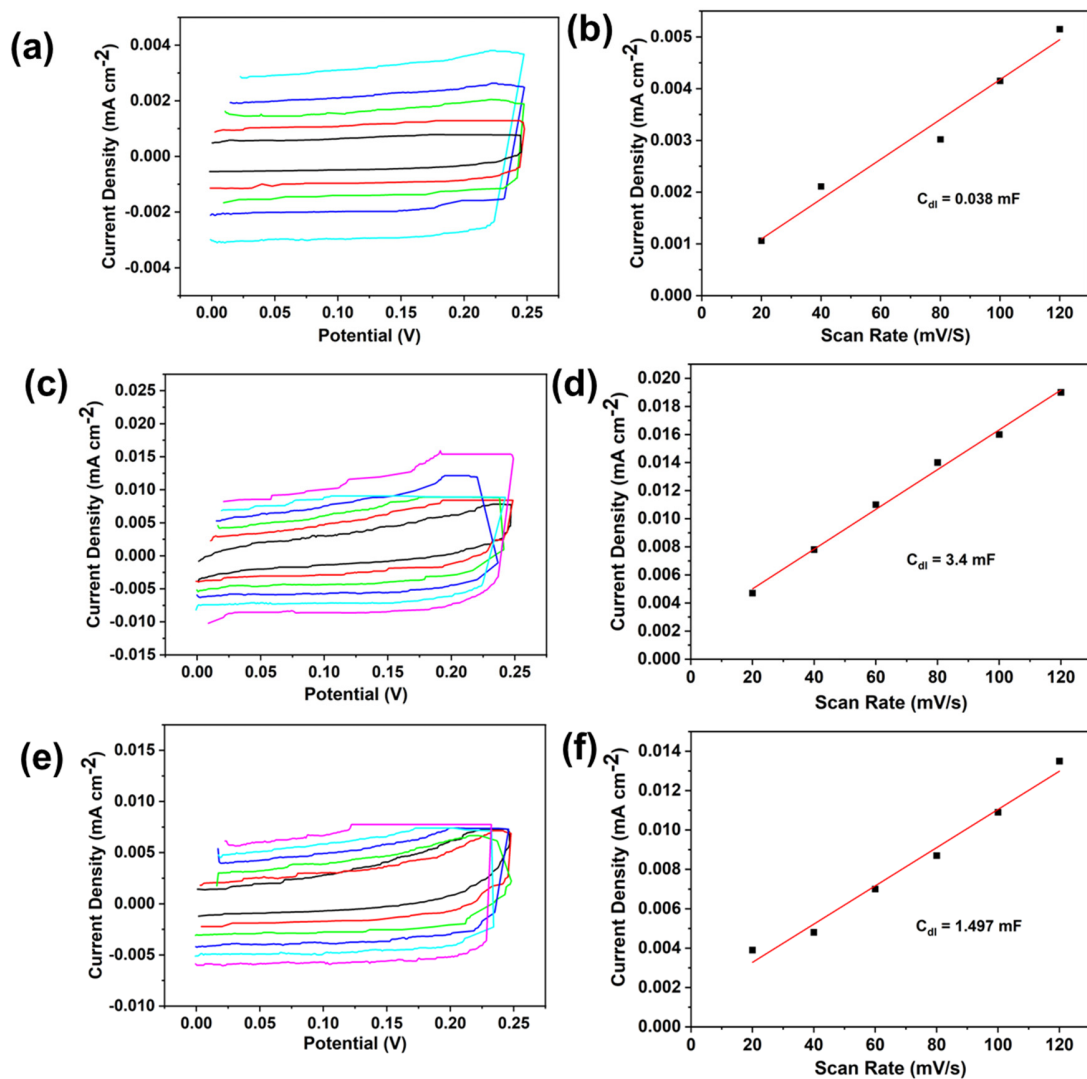

**Figure S6.** Double layer capacitance and respective CVs of (a,b) bare CPE electrode, (c,d) ZIF-8, (e,f)  $\text{CoFe}_2\text{O}_4$  at scan rate 20-120  $\text{mV s}^{-1}$ .

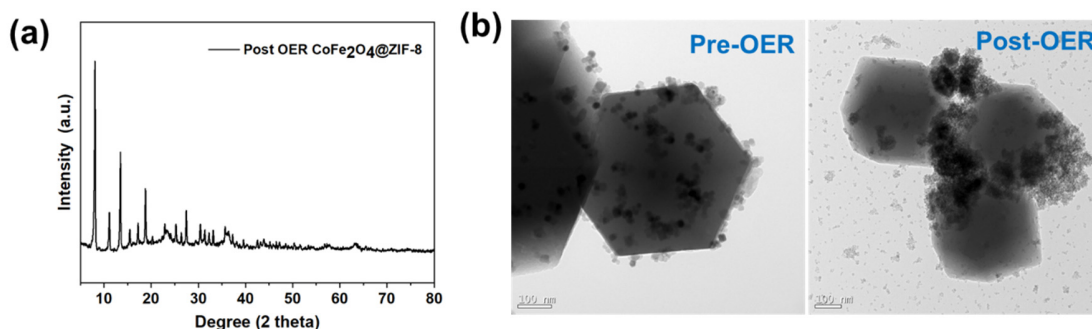

**Figure S7.** Pre and Post OER characterization of CoFe<sub>2</sub>O<sub>4</sub>@ZIF-8 composite; (a) PXRD, (b) TEM images.
